# Supplementary material
Source: Springer Nature journal article supplement (https://www.springermedizin.de/resource/supplementary/13002_2009_187_MOESM3_ESM.pdf/9627340)

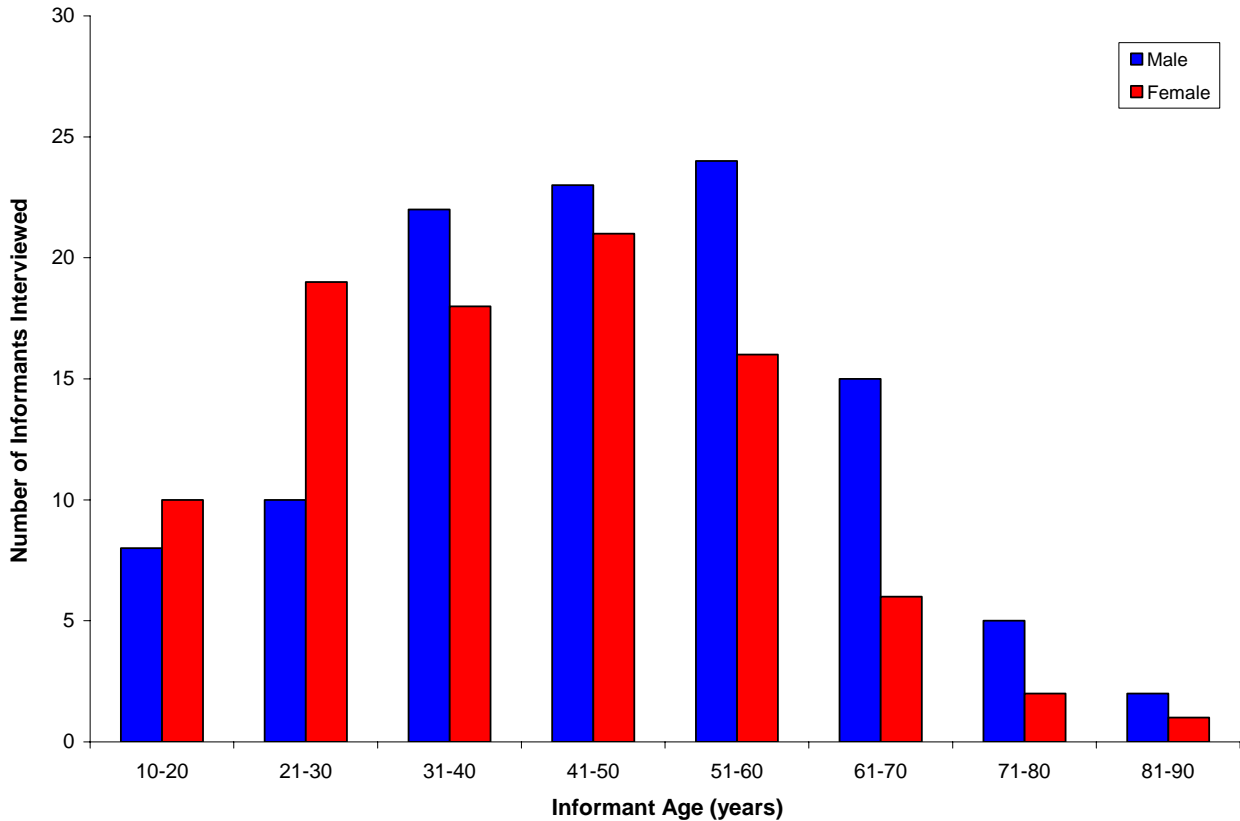

Supplement: MOESM3 [file 9627340]
